1 **Effects of climatic change on the potential distribution of *Lycoriella* species**  
2 **(Diptera: Sciaridae) of economic importance**

3 Roberta Marques<sup>a,c,g</sup>, Juliano Lessa Pinto Duarte<sup>b</sup>, Adriane da Fonseca Duarte<sup>b</sup>,  
4 Rodrigo Ferreira Krüger<sup>c</sup>, Uemerson Silva da Cunha<sup>b</sup>, Luís Osorio-Olvera<sup>d</sup>, Rusby  
5 Guadalupe Contreras-Díaz<sup>e,f</sup>, and, Daniel Jiménez-García<sup>g</sup>

6 Institutions/affiliations

7 <sup>a</sup>Departamento de Saúde Coletiva, Faculdade de Ciências Médicas, Universidade  
8 Estadual de Campinas, Campinas, São Paulo, Brasil.

9 <sup>b</sup>Departamento de Fitossanidade, Faculdade de Agronomia Eliseu Maciel,  
10 Universidade Federal de Pelotas - UFPel, Campus Capão do Leão, Capão Do Leão,  
11 Brasil.

12 <sup>c</sup>Laboratório de Ecologia de Parasitos e Vetores, Departamento de Microbiologia e  
13 Parasitologia, Universidade Federal de Pelotas, Pelotas, Brasil.

14 <sup>d</sup>Departamento de Ecología de la Biodiversidad, Instituto de Ecología, Universidad  
15 Nacional Autónoma de México, Ciudad de México, México

16 <sup>e</sup>Departamento de Matemáticas, Facultad de Ciencias, Universidad Nacional  
17 Autónoma de México, Ciudad de México, México.

18 <sup>f</sup>Posgrado en Ciencias Biológicas, Unidad de Posgrado, Universidad Nacional  
19 Autónoma de México, Ciudad de México, México

20 <sup>g</sup>Laboratorio de Biodiversidad, Centro de Agroecología y Ambiente. Instituto de  
21 Ciencias de la Benemérita Universidad Autónoma de Puebla, Puebla, México.

22 Author emails:

23

24 Roberta Marques: roberta.marques@viep.com.mx

25 Juliano L. P. Duarte: duartejlp@gmail.com

26 Adriane da F. Duarte: adriane.faem@hotmail.com

27 Rodrigo F. Krüger: rfkruger@gmail.com

28 Uemerson S. da Cunha: uscunha@yahoo.com.br

29 Luís Osorio-Olvera: luis.osorio@ieciologia.unam.mx

30 Rusby G. Contreras-Díaz: rusby.contreras.diaz@gmail.com

31 Daniel Jiménez-García: daniel.jimenez@correo.buap.mx

32

33 Corresponding authors:

34 Juliano L. P. Duarte: julianojlp@hotmail.com

35 Daniel Jiménez-García: daniel.jimenez@correo.buap.mx

## 36 **Abstract**

37 *Lycoriella* species (Sciaridae) are responsible for significant economic losses in  
38 greenhouse production (e.g. mushrooms, strawberry, and nurseries). Current  
39 distributions of species in the genus are restricted to cold-climate countries. Three  
40 species of *Lycoriella* are of particular economic concern in view of their ability to invade  
41 across the Northern Hemisphere. We used ecological niche models to determine the  
42 potential for range expansion under climate change future scenarios (RCP 4.5 and  
43 RCP 8.5) in distributions of these species of *Lycoriella*. Stable suitability under climate  
44 change was a dominant theme in these species; however, potential range increases  
45 were noted for key countries (e.g. USA, Brazil, and China). Our results illustrate the  
46 potential for range expansion in these species in the Southern Hemisphere, including  
47 some of the highest greenhouse production areas in the world.

48 **Keywords:** Greenhouse, Environmental suitability, Mushroom pest, Black fungus  
49 gnats

## 50 1. Introduction

51           Sciaridae (Insecta, Diptera), known as black fungus gnats, comprise more than  
52 2600 species worldwide, most of which are harmless to human activities [1]. Although  
53 most of the species have phyto-saprophagous larvae, 10 known species have larvae  
54 that may feed on living tissue, damaging roots or mining stems and leaves of  
55 economically important crops and ornamental plants, which can lead to significant  
56 economic losses [2–5].

57           Mushroom crops can be affected severely by sciarids. Sciarid larvae can feed  
58 on the developing mycelium inside the substrate and destroy sporophore primordia.  
59 Mature mushrooms may also be damaged by larvae tunneling into the tissue, which  
60 leads to product depreciation. Severe larval infestations may even destroy the  
61 sporophores, causing severe economic losses to producers [6].

62           Since 1978 worldwide production of cultivated edible fungi has increased  
63 around 30-fold and is expected to increase further in coming years [7]. Mushrooms  
64 represented a global market of US\$63B in 2013 [8]. According to the USDA, the value  
65 of mushroom sales for 2019-2020 in the USA was US\$1.15B, up 3% from the previous  
66 season [9]. Among the mushrooms produced, *Agaricus bisporus* is the most important,  
67 according to the Economics, Statistics and Market Information System. In 2020-2021,  
68 the area under production is 12,470 m<sup>2</sup>, 56.5% of which is in Pennsylvania territory  
69 [9].

70           The mushroom industry has suffered major economic losses caused by sciarid  
71 larvae in Australia, USA, Russia, United Kingdom, and South Korea [10,11]. Three  
72 sciarid species of the genus *Lycoriella* Frey, 1942 (*L. agraria*, *L. ingenua*, and *L.*  
73 *sativae*) are particularly harmful to cultivated mushroom crops, and are considered to

74 rank among the most important pests of cultivated mushrooms throughout the world  
75 [4,10]. In countries like the United States and England, *L. ingenua* and *L. sativae* are  
76 the most serious pests in mushroom crops [12], as well in Europe [10]. In Korea, *L.*  
77 *ingenua* is considered as the most economically important [11]. Given their small size,  
78 sciarid larvae can be transported inadvertently to new areas by human activities.  
79 Infested potting mix, soilless media, commercial plant substrate, and rooted plant  
80 plugs have been shown to act as pathways for sciarid movement [13]. From 1950  
81 onwards, globalization promoted transporting these invasive species [14]. In this  
82 sense, studies of their ecology, environmental requirements, and climatic change  
83 impacts for establishment of invasive populations are needed.

84 Ecological niche modeling (ENM) is used to evaluate relationships between  
85 environmental conditions and species' abundances and occurrences [15].  
86 Understanding potential distributions of species represents an important opportunity  
87 for pest control and mitigation of possible invaders (e.g. Compton et al., 2010; Gallien  
88 et al., 2010; Thuiller et al., 2005). Considering that the three *Lycoriella* species are  
89 economically important and are invasive species [10,19], niche modeling allows  
90 researchers to identify areas not currently occupied by them; if dispersal is possible or  
91 facilitated, these areas can be invaded and populations established in these regions  
92 [15]. For these reasons, we used ENM to identify new regions of potential invasive risk  
93 for three *Lycoriella* species with pest status in mushroom production, under current  
94 and future climate conditions (2050) for two greenhouse gas emissions scenarios.

95

## 96 **2. Materials and Methods**

### 97 2.1 Occurrence data

98 Occurrence data for *Lycoriella* species were obtained from published papers  
99 available in bibliographic databases (Google Scholar, Web of Science, Scopus), and  
100 from SpeciesLink (<http://slink.cria.org.br/>) and GBIF (<http://www.gbif.org>). We gathered  
101 all data from 1950-2018 for synonyms [3] including *L. agraria* [20] and its synonym  
102 *Sciara multiseta* [21], *L. ingenua* [22] and its synonym *S. pauciseta* [23] and *L. sativae*  
103 [24], and its synonyms *L. auripila* [25] and *L. castanescens* [26]. Occurrences lacking  
104 geographic coordinates were georeferenced in Google Earth (2015;  
105 <https://earth.google.com/web/>). We excluded records lacking the exact location or with  
106 high geographic uncertainty (e.g. name of the country as a collection site).

107 We assembled the occurrence data for each *Lycoriella* species, and performed  
108 a geographic spatial thinning such that no thick points were closer than 50 km using  
109 the spThin R package [27]. As such, we used 43 *L. agraria* occurrences, 118 *L.*  
110 *ingenua* occurrences, and 136 *L. sativae* occurrences. Finally, the data were split  
111 randomly into two subsets: 50% for model training and 50% for model testing (Suppl.  
112 information figures 1, 2 and 3).

113

## 114 2.2 Environmental variables

115 The bioclimatic variables used here to summarize climatic variation were from  
116 WorldClim version 1.4 [28]; we excluded four variables (bio 8, bio 9, bio 18, bio 19)  
117 that present spatial artefacts [29]. We summarized future conditions via 22 general  
118 circulation models (GCMs; Suppl. information figures 4, 5 and 6) for 2050 available  
119 from Climate Change, Agriculture and Food Security [30]. Two greenhouse gas  
120 emissions scenarios (RCP 4.5 and RCP 8.5) were used to explore variation among  
121 possible future emissions trajectories. The climate variables were used at a spatial

122 resolution of 2.5 min (~5 km<sup>2</sup>). We used Pearson's correlations across each of the  
123 calibration areas for each species, removing one from each pair of variables with  
124 correlation  $\geq 0.80$ . The remaining not correlated variables were grouped into all  
125 possible sets of  $\geq 2$  variables for testing (Cobos et al., 2019; Table 1).

126

### 127 2.3 Model calibration and evaluation

128 We calibrated candidate models in Maxent 3.4.1 (Phillips et al., 2006), and model  
129 selection was achieved using the kuenm R package [32]. We assessed all potential  
130 combinations of linear (l), quadratic (q), product (p), threshold (t), and hinge (h) feature  
131 types; in tandem with 9 regularization multiplier values (0.1, 0.3, 0.5, 0.7, 1, 3, 5, 7 and  
132 10); and the 26, 247, and 120 environmental data sets described above, for *L. agraria*,  
133 *L. ingenua*, and *L. sativae*, respectively. We therefore explored 1170 candidate models  
134 for *L. agraria*, 15,561 for *L. ingenua*, and 5400 for *L. sativae* (Table 1). We evaluated  
135 significance, performance, and complexity, of each candidate model, to choose  
136 optimal parameter settings, as follows. Significance testing was via partial receiver  
137 operating characteristic (pROC) tests [33]; values of partial ROC were calculated  
138 based on maximum acceptable omission error rate of  $E = 0.05$ . Omission rates were  
139 determined using a random 50% of the occurrence data, and model predictions were  
140 binarized via a modified least training presence thresholding approach ( $E = 0.05$ ).  
141 Finally, we evaluated model complexity using the Akaike information criterion with  
142 correction for small sample size (AICc), following Warren and Seifert (2011). All  
143 modeling processes were included in the kuenm R package [32].

144 We use a hypothesis of the accessible area (**M**) for each species to calibrate  
145 our models [35,36], using buffers of 50 km around occurrence data points remaining

146 after spatial thinning. Final models were taken as the median of the 10 replicates for  
147 best models and were projected worldwide. Model summaries were generated from  
148 thresholded median model projections (Figure 2) using the  $E = 0.05$  value. We used  
149 the kuenm package [32] for these final steps as well. For each future-climate scenario  
150 (RCP 4.5 and RCP 8.5), we transferred the models and evaluated extrapolation  
151 conditions through MOP analysis [37], using the ntbox R package [38].

152 We summarized the projections of the models as medians of the replicate  
153 models using a modified least presences threshold value of  $E = 0.05$ . Binary maps for  
154 future conditions were used to determine uncertainty in terms of disagreement among  
155 predictions from the different GCMs (Suppl. information figures 4, 5 and 6). We  
156 summed the maps and used overlap between present and future potential distribution  
157 areas to determine prediction stability and range increase for each species in  
158 geographic areas with low extrapolation risk based in MOP analysis (Supp. information  
159 figures 7, 8 and 9).

160

### 161 **3. Results**

162 We created and evaluated 22,131 candidate models for the three *Lycoriella*  
163 species, (Table 1). For *L. agraria*, of 1170 candidate models, 669 were significant ( $P$   
164  $< 0.05$ ) and 575 had omission rates below 5%; of significant, low omission models, 7  
165 were selected according to low complexity (AICc; Table 1). Of 15,561 candidate  
166 models for *L. ingenua*, 6898 were significant and 6789 models had omission rates  
167 below 5%; we selected 6 models based on complexity. Finally, we generated 5400  
168 candidate models for *L. sativae*, of which 1323 were significant and 1061 had omission  
169 rates below 5%; we selected 7 models according to AIC criteria (Table 1).

170           Nine variables were identified as key in our ENMs (Table 2). In general,  
171 *Lycoriella* species showed relationships with seasonality in temperature and  
172 precipitation, and with variables related to cold temperatures and wet seasons (Table  
173 2), with variable contributions ranging 4.6-49.8%. The maximum number of variables  
174 for best models was in *L. sativae*, including high differences in variable contribution  
175 (Table 2).

176           Current suitable areas for *Lycoriella* species includes much of the Northern  
177 Hemisphere, except for parts of Greenland, Russia, and northern China. *L. ingenua*  
178 and *L. sativae* also had suitable areas in the Southern Hemisphere: South America,  
179 southern Africa, and Australia (Figures 1 and 2). The model for *L. agraria* indicated  
180 high suitability in parts of North America, except Mexico (Figures 1 and 2), as well as  
181 much of Eurasia except for Russia, the Indian Subcontinent, and Southeast Asia.  
182 Suitable areas for *L. ingenua* were indicated for much of the Americas, except for parts  
183 of Canada, Alaska, Central America, and northern South America. *Lycoriella sativae*  
184 showed high suitability in the Americas, except in the western United States, northern  
185 Canada, central Mexico, and parts of South America (e.g. northern Brazil, Pacific  
186 Coast). Eastern and southern Asia was not suitable for this species; nor were much of  
187 Australia, North Africa, or parts of central and southern Africa.

188           Stable suitable conditions for the three *Lycoriella* species were the dominant  
189 pattern in comparisons of current and future potential distributions (Figure 1 and suppl.  
190 information figures 4, 5 and 6). Potential range expansion for the three species were  
191 noted in North America and Southeast Asia (Figure 1 and suppl. information figures 4,  
192 5 and 6). Range reductions were detected in each species but covered (less than ~  
193 78,000 km<sup>2</sup>) in disaggregated pixels; however, main reduction areas were in the Asia



194 (southern China and Mongolia). The broadest range expansions for *L. agraria* were  
195 anticipated in Asia (China, Russia, and Mongolia). In contrast, for *L. ingenua*, our  
196 results did not show a homogeneous pattern of potential range expansion; however,  
197 we noted increases in suitability in the Americas, Africa, Asia, Europe, and Australia.  
198 The biggest changes in distributional potential of *L. sativae* were in North America and  
199 western parts of South America (Figure 1). New potential range areas were also in  
200 Alaska and Canada (Figure 1). *Lycoriella agraria* and *L. sativae* potential range  
201 overlap was indicated in the western United States (Nevada, Arizona, Idaho,  
202 Wyoming, and Colorado) (Figures 1, and 2). Potential range overlap of *L. agraria* with  
203 *L. ingenua*, and *L. ingenua* with *L. sativae* were noted in central and western China  
204 (Qinghai, Xizang, and Xinjiang), central Kazakhstan, northern and northwestern  
205 Mongolia, northern Siberia, and the border regions between China and Mongolia  
206 (Figures 1, and 2).

207

#### 208 **4. Discussion**

209 It is generally accepted that environmental changes will modify species'  
210 geographic distributions worldwide [39]. Understanding how these changes will  
211 influence species' distributions is particularly key for economically important species.  
212 The Sciaridae occurs almost worldwide [10], including important pests in mushroom  
213 crops, for example, [3], mainly in the genera *Bradysia* and *Lycoriella* [6].

214 *Lycoriella* includes the most threatening pests (e.g. our three species), causing  
215 important damage to mushroom production [4]. In Korea, the most economically  
216 important oyster mushroom pest is *L. ingenua*, among the six mushroom fly species

217 [11]. Usually, *L. sativae* is the most abundant in fields, but is much less damaging than  
218 *L. ingenua* in mushroom culture [3].

219         How climate change will affect the geographic distributions of economically  
220 important sciarid species remains an open question. According to Sawangproh et al.  
221 (2016), ambient temperature can affect not only the survival and larval development  
222 of sciarid flies but also their feeding activity. As such, damage in mushroom crops or  
223 nurseries will be influenced by lower or higher temperatures. Apart from regional  
224 species checklists, little is known about the factors that drive these species'  
225 distributions, so consequently little is known about impacts of climate change on the  
226 future distributions of these species. These insects are easily transported by human  
227 activities and, once they reach a suitable environment, they can build up populations,  
228 which can lead to major economic losses and establish populations in mushroom  
229 production areas.

230         Few studies have investigated the presence of sciarids in the Afrotropical  
231 region. Chidziya et al. (2013) considered *L. ingenua* (as *L. mali*) as the most damaging  
232 mushroom fly in Zimbabwe, but provided no occurrence records for the species.  
233 Katumanyane et al. (2020) reported for the first time the presence of both *L. ingenua*  
234 and *L. sativae* in South Africa. Our model has predicted suitable environmental  
235 conditions for these species in the southern portion of the African continent, including  
236 the above-mentioned countries (Figures 1, and 2), though no points from either  
237 country were included in the dataset used in model calibration.

238         The dominant and most serious pest species in mushroom crops in North  
239 America is *L. ingenua* [12]. Our results show that, for the USA, for example, current  
240 environmental suitability for this species is moderate for the entire West Coast and

241 most of the southeastern part of the country, including most of the East Coast (Figure  
242 1 and supp. information figure 5). Most of California presents high environmental  
243 suitability for the species, which is particularly relevant because California ranks  
244 second in the number of mushroom growers in the country, following only  
245 Pennsylvania [9].

246 Pennsylvania itself has moderate current environmental suitability (Figure 2),  
247 and our model predicts stable environmental suitability for the state under future  
248 scenarios (supp. information figure 5). These results should be taken into  
249 consideration, since it could lead to major economic losses to mushroom producers,  
250 considering that about 66% of all US mushroom growers are located in this state [9].

251 In South America, on the other hand, mushroom production is still incipient. It  
252 plays a growing social role as it becomes a different source of income for producers  
253 at local level. Brazil is the most outstanding case in South America, although efforts to  
254 cultivate mushrooms are beginning in other countries [43].

255 So far, no official record of species of *Lycoriella* exists for Brazil. Our model  
256 showed high environmental suitability in most of southern and southwestern Brazil for  
257 *L. ingenua* and *L. sativae* (Figure 2). As such, once these species are introduced in  
258 the country, they will likely have the ability to establish stable populations, a fact that  
259 must be regarded with caution because most Brazilian mushroom production is  
260 concentrated in the southern and southwestern states. Introduction of *Lycoriella*  
261 species to the country would pose an extra threat for Brazilian mushroom growers,  
262 who already face problems with other sciarid and scatopsid species [44,45].

263 The genus *Lycoriella* significantly reduces mushroom production inside  
264 greenhouses; these species also may impact other agricultural species (e.g.

265 strawberry, nursery plants [6,46,47]. Our results show areas with suitable conditions  
266 for these flies around the world (Figure 2). We are particularly concerned about  
267 greenhouse availability, although we are not incorporating possible competition with  
268 other species in our models. However, *Lycoriella* species show very broad ecological  
269 niches with high possibilities invasive potential, from Brazil to Alaska. We suggest that  
270 experimental physiological studies that address the fundamental niche of these  
271 species more directly will be an important next step in protecting food production in  
272 greenhouses, to characterize areas with environmental conditions that characterize  
273 the physiological limits adequate to the development of *Lycoriella* populations.

274

#### 275 **Authors' contributions**

276 **RM:** Conceptualization, Analysis, Writing Original Draft, Supervision, Project  
277 Administration, Analysis and Construction.

278 **JD:** Conceptualization, Data Curation, Writing Original Draft, Discussion.

279 **RK:** Conceptualization, Discussion.

280 **AF:** Writing Original Draft, Data Curation, Discussion

281 **CU:** Writing Original Draft

282 **DJG:** Conceptualization, Analysis, Writing Original Draft, Discussion.

283

#### 284 **5. Acknowledgments**

285           We thank A. Townsend Peterson for comments and suggestions. We thank the  
286   Coordenação de Aperfeiçoamento de Pessoal de Nível Superior (CAPES) for the  
287   Ph.D scholarship awarded to Roberta Marques, for financial support in the “sandwich”  
288   program (Process: 47/2017), and for grants awarded to the second and third authors  
289   (CAPES grant numbers 88882.306693/2018-01 and 88882.182253/2018-01,  
290   respectively).

## 291 6. References

- 292 1. Vilkamaa P. Checklist of the family Sciaridae (Diptera) of Finland. Zookeys.  
293 2014; 151–164. doi:10.3897/zookeys.441.7381
- 294 2. Han QX, Cheng DM, Luo J, Zhou CZ, Lin QS, Xiang MM. First report of  
295 *Bradysia difformis* (Diptera: Sciaridae) damage to *Phalaenopsis* orchid in China.  
296 Journal of Asia-Pacific Entomology. 2015;18: 77–81.  
297 doi:10.1016/j.aspen.2014.12.005
- 298 3. Mohrig W, Heller K, Hippha H, Vilkamaa P, Menzel F. Revision of black fungus  
299 gnats (Diptera: Sciaridae) of North America. Studia Dipterologica. 2013;19:  
300 141–286.
- 301 4. Shin S-G, Lee H-S, Lee S. Dark winged fungus gnats (Diptera: Sciaridae)  
302 collected from shiitake mushroom in Korea. Journal of Asia-Pacific Entomology.  
303 2012;15: 174–181. doi:10.1016/j.aspen.2011.09.005
- 304 5. Ye L, Leng R, Huang J, Qu C, Wu H. Review of three black fungus gnat species  
305 (Diptera: Sciaridae) from greenhouses in China: three greenhouse sciarids from  
306 China. Journal of Asia-Pacific Entomology. 2017;20: 179–184.  
307 doi:10.1016/j.aspen.2016.12.012
- 308 6. Shamsad A. The development of integrated pest management for the control  
309 of mushroom sciarid flies, *Lycoriella ingenua* (Dufour) and *Bradysia ocellaris*  
310 (Comstock), in cultivated mushrooms. Pest Management Science. 2010;66:  
311 1063–1074. doi:https://doi.org/10.1002/ps.1987
- 312 7. Grimm D, Wösten HAB. Mushroom cultivation in the circular economy. Applied  
313 Microbiology and Biotechnology. 2018;102: 7795–7803. doi:10.1007/s00253-  
314 018-9226-8
- 315 8. Royse DJ, Baars J, Tan Q. Current overview of mushroom production in the  
316 world. In: Diego CZ, Pardo-Giménez A, editors. Edible and Medicinal  
317 Mushrooms. Chichester, UK: John Wiley & Sons, Ltd; 2017. pp. 5–13.  
318 doi:10.1002/9781119149446.ch2
- 319 9. USDA. Mushrooms. National Agricultural Statistics Service, Agricultural  
320 Statistics Board. Washington, D.C.; 2020 p. 17. Available:  
321 [https://www.nass.usda.gov/Statistics\\_by\\_State/Wisconsin/Publications/Crops/20](https://www.nass.usda.gov/Statistics_by_State/Wisconsin/Publications/Crops/2020/US-Mushrooms-08-20.pdf)  
322 [20/US-Mushrooms-08-20.pdf](https://www.nass.usda.gov/Statistics_by_State/Wisconsin/Publications/Crops/2020/US-Mushrooms-08-20.pdf)
- 323 10. Lewandowski M, Szyk A, BEDNAREK A. Biology and morphometry of  
324 *Lycoriella ingenua* (Diptera: Sciaridae). Biological Letters. 2004;41: 41–50.
- 325 11. Yi J-H, Park I-K, Choi K-S, Shin S-C, Ahn Y-J. Toxicity of medicinal plant  
326 extracts to *Lycoriella ingenua* (Diptera: Sciaridae) and *Coboldia fuscipes*  
327 (Diptera: Scatopsidae). Journal of Asia-Pacific Entomology. 2008;11: 221–223.  
328 doi:10.1016/j.aspen.2008.09.002

- 329 12. Rinker DL. Insect, mite, and nematode pests of commercial mushroom  
330 production. In: Zied C and Pardo-Giménez A Edible and Medicinal Mushrooms.  
331 John Wiley & Sons, Ltd; 2017. pp. 221–237. doi:10.1002/9781119149446.ch11
- 332 13. Cloyd RA, Zaborski ER. Fungus gnats, *Bradysia* spp. (Diptera: Sciaridae), and  
333 other arthropods in commercial bagged soilless growing media and rooted plant  
334 plugs. *ec.* 2004;97: 503–510. doi:10.1603/0022-0493-97.2.503
- 335 14. Hulme PE. Trade, transport and trouble: managing invasive species pathways in  
336 an era of globalization. *Journal of Applied Ecology.* 2009;46: 10–18.  
337 doi:<https://doi.org/10.1111/j.1365-2664.2008.01600.x>
- 338 15. Peterson A, Soberón J, G. Pearson R, Anderson R, Martínez-Meyer E,  
339 Nakamura M, et al. *Ecological Niches and Geographic Distributions.* Princeton:  
340 Princeton University Press; 2011.
- 341 16. Compton TJ, Leathwick JR, Inglis GJ. Thermogeography predicts the potential  
342 global range of the invasive European green crab (*Carcinus maenas*). *Diversity*  
343 *and Distributions.* 2010;16: 243–255. doi:10.1111/j.1472-4642.2010.00644.x
- 344 17. Gallien L, Münkemüller T, Albert CH, Boulangeat I, Thuiller W. Predicting  
345 potential distributions of invasive species: where to go from here? *Diversity and*  
346 *Distributions.* 2010;16: 331–342. doi:10.1111/j.1472-4642.2010.00652.x
- 347 18. Thuiller W, Richardson DM, Pyšek P, Midgley GF, Hughes GO, Rouget M.  
348 Niche-based modelling as a tool for predicting the risk of alien plant invasions at  
349 a global scale. *Global Change Biology.* 2005;11: 2234–2250.  
350 doi:<https://doi.org/10.1111/j.1365-2486.2005.001018.x>
- 351 19. Papp L, Darvas B. Contributions to a manual of Palaearctic Diptera. *Science*  
352 *Herald*; 1997. Available: [https://agris.fao.org/agris-](https://agris.fao.org/agris-search/search.do?recordID=US201300058453)  
353 [search/search.do?recordID=US201300058453](https://agris.fao.org/agris-search/search.do?recordID=US201300058453)
- 354 20. GBIF. Download *Lycoriella agraria* occurrences. 15 Nov 2020 [cited 14 Jan  
355 2021]. Available: <https://doi.org/10.15468/dl.hrntwd>
- 356 21. GBIF. Download *Sciara multiseta* occurrences. 15 Nov 2020 [cited 14 Jan  
357 2021]. Available: <https://doi.org/10.15468/dl.e6qf9b>
- 358 22. GBIF. Download *Lycoriella ingenua* occurrences. 15 Nov 2020 [cited 14 Jan  
359 2021]. Available: <https://doi.org/10.15468/dl.7y5g8w>
- 360 23. GBIF. Download *Sciara pauciseta* occurrences. 15 Nov 2020 [cited 14 Jan  
361 2021]. Available: <https://doi.org/10.15468/dl.uhk2m4>
- 362 24. GBIF. Download *Lycoriella sativae* occurrences. 15 Nov 2020 [cited 14 Jan  
363 2021]. Available: <https://doi.org/10.15468/dl.qdcafo>
- 364 25. GBIF. Download *Lycoriella auripila* occurrences. 15 Nov 2020 [cited 14 Jan  
365 2021]. Available: <https://doi.org/10.15468/dl.yjtvtv>



- 366 26. GBIF. Download *Lycoriella castanescens* occurrences. 15 Nov 2020 [cited 14  
367 Jan 2021]. Available: <https://doi.org/10.15468/dl.yobjuj>
- 368 27. Aiello-Lammens ME, Boria RA, Radosavljevic A, Vilela B, Anderson RP. spThin:  
369 an R package for spatial thinning of species occurrence records for use in  
370 ecological niche models. *Ecography*. 2015;38: 541–545.  
371 doi:<https://doi.org/10.1111/ecog.01132>
- 372 28. Hijmans RJ, Cameron SE, Parra JL, Jones PG, Jarvis A. Very high resolution  
373 interpolated climate surfaces for global land areas. *International Journal of*  
374 *Climatology*. 2005;25: 1965–1978. doi:10.1002/joc.1276
- 375 29. Escobar LE, Lira-Noriega A, Medina-Vogel G, Peterson AT. Potential for spread  
376 of the white-nose fungus (*Pseudogymnoascus destructans*) in the Americas:  
377 use of Maxent and NicheA to assure strict model transference. 1. 2014; 221–  
378 229. doi:10.4081/gh.2014.19
- 379 30. CCAFS. GCM Downscaled Data Portal - Spatial Downscaling Data. 4 May 2020  
380 [cited 4 May 2020]. Available: [http://www.ccafs-](http://www.ccafs-climate.org/data_spatial_downscaling/)  
381 [climate.org/data\\_spatial\\_downscaling/](http://www.ccafs-climate.org/data_spatial_downscaling/)
- 382 31. Cobos ME, Peterson AT, Osorio-Olvera L, Jiménez-García D. An exhaustive  
383 analysis of heuristic methods for variable selection in ecological niche modeling  
384 and species distribution modeling. *Ecological Informatics*. 2019;53: 100983.  
385 doi:10.1016/j.ecoinf.2019.100983
- 386 32. Cobos ME, Peterson AT, Barve N, Osorio-Olvera L. kuenm: an R package for  
387 detailed development of ecological niche models using Maxent. *PeerJ*. 2019;7:  
388 e6281. doi:10.7717/peerj.6281
- 389 33. Peterson AT, Papeş M, Soberón J. Rethinking receiver operating characteristic  
390 analysis applications in ecological niche modeling. *Ecological Modelling*.  
391 2008;213: 63–72. doi:10.1016/j.ecolmodel.2007.11.008
- 392 34. Warren DL, Seifert SN. Ecological niche modeling in Maxent: the importance of  
393 model complexity and the performance of model selection criteria. *Ecological*  
394 *Applications*. 2011;21: 335–342. doi:<https://doi.org/10.1890/10-1171.1>
- 395 35. Anderson RP, Raza A. The effect of the extent of the study region on GIS  
396 models of species geographic distributions and estimates of niche evolution:  
397 preliminary tests with montane rodents (genus *Nephelomys*) in Venezuela.  
398 *Journal of Biogeography*. 2010;37: 1378–1393.  
399 doi:<https://doi.org/10.1111/j.1365-2699.2010.02290.x>
- 400 36. Barve N, Barve V, Jiménez-Valverde A, Lira-Noriega A, Maher SP, Peterson  
401 AT, et al. The crucial role of the accessible area in ecological niche modeling  
402 and species distribution modeling. *Ecological Modelling*. 2011;222: 1810–1819.  
403 doi:10.1016/j.ecolmodel.2011.02.011
- 404 37. Owens HL, Campbell LP, Dornak LL, Saupe EE, Barve N, Soberón J, et al.  
405 Constraints on interpretation of ecological niche models by limited



- 406 environmental ranges on calibration areas. *Ecological Modelling*. 2013;263: 10–  
407 18. doi:10.1016/j.ecolmodel.2013.04.011
- 408 38. Osorio-Olvera L, Lira-Noriega A, Soberón J, Peterson AT, Falconi M, Contreras-  
409 Díaz RG, et al. ntbox: An r package with graphical user interface for modelling  
410 and evaluating multidimensional ecological niches. *Methods in Ecology and*  
411 *Evolution*. 2020;11: 1199–1206. doi:<https://doi.org/10.1111/2041-210X.13452>
- 412 39. IPCC. Climate Change 2014: Synthesis Report. New York, NY:  
413 Intergovernmental Panel on Climate Change; 2014. Available: [https://www.ipcc.](https://www.ipcc.ch/pdf/assessment-3-report/ar5/syr/AR5_SYR_FINAL_SPM.pdf)  
414 [ch/pdf/assessment-3 report/ar5/syr/AR5\\_SYR\\_FINAL\\_SPM.pdf](https://www.ipcc.ch/pdf/assessment-3-report/ar5/syr/AR5_SYR_FINAL_SPM.pdf)
- 415 40. Sawangproh W, Ekroos J, Cronberg N. The effect of ambient temperature on  
416 larvae of *Scatopsiara cunicularius* (Diptera: Sciaridae) feeding on the thallose  
417 liverwort *Marchantia polymorpha*. *European Journal of Entomology*. 2016;113:  
418 259–264. doi:10.14411/eje.2016.030
- 419 41. Chidziya E, Mutangadura D, Jere J, Siziba L. A comparative evaluation of  
420 locally available substrates for rearing and studying biology of sciarid fly,  
421 *Lycoriella mali*. *Academia Journal of Biotechnology*. 2013;1: 057–061.
- 422 42. Katumanyane A, Kanzi AM, Malan AR. Sciarid pests (Diptera: Sciaridae) from  
423 undercover crop production in South Africa. *South African Journal of Science*.  
424 2020;116: 1–6. doi:10.17159/sajs.2020/6822
- 425 43. Gaitán-Hernández R. Uso del sustrato residual del cultivo de *Pleurotus* spp. 1ra  
426 ed. Sánchez JE and Royse DJ La biología, el cultivo y las propiedades  
427 nutricionales y medicinales de las setas *Pleurotus* spp. 1ra ed. Tapachula,  
428 Chiapas, México: El Colegio de la Frontera Sur; 2017. pp. 261–282.
- 429 44. Duarte JLP, da Fonseca Duarte A, da Cunha US. A new threat for mushroom  
430 growers in South America: first record of *Coboldia fuscipes* (Meigen, 1830)  
431 (Diptera, Scatopsidae) massive damage to *Pleurotus* spp. *International Journal*  
432 *of Tropical Insect Science*. 2020;41: 887–890. doi:10.1007/s42690-020-00172-1
- 433 45. Menzel F, Smith JE, Colauto NB. *Bradysia difformis* Frey and *Bradysia ocellaris*  
434 (Comstock): two additional Neotropical species of black fungus gnats (Diptera:  
435 Sciaridae) of economic importance: a redescription and review. *Annals of the*  
436 *Entomological Society of America*. 2003;96: 448–457. doi:10.1603/0013-  
437 8746(2003)096[0448:BDFABO]2.0.CO;2
- 438 46. Broadley A, Kauschke E, Mohrig W. Black fungus gnats (Diptera: Sciaridae)  
439 found in association with cultivated plants and mushrooms in Australia, with  
440 notes on cosmopolitan pest species and biosecurity interceptions. *Zootaxa*.  
441 2018;4415: 201–242. doi:10.11646/zootaxa.4415.2.1
- 442 47. Jess S, Schweizer H. Biological control of *Lycoriella ingenua* (Diptera:  
443 Sciaridae) in commercial mushroom (*Agaricus bisporus*) cultivation: a  
444 comparison between *Hypoaspis miles* and *Steinernema feltiae*. *Pest*  
445 *Management Science*. 2009;65: 1195–1200. doi:<https://doi.org/10.1002/ps.1809>

446 Table 1. Best models selected and evaluated based on statistical significance (partial  
 447 ROC), performance (omission rates: OR), and complexity (AICc). This model was  
 448 calibrated and projected using the environmental variables shown in Table 2.  
 449

| <i>Lycoriella</i><br>species       | Mean<br>AUC<br>ratio | pROC<br>value | P | Omission<br>rate at 5% | AICc     | Delta<br>AICc | Reg.<br>multiplier | Feature<br>classes |
|------------------------------------|----------------------|---------------|---|------------------------|----------|---------------|--------------------|--------------------|
|                                    | 1.000                | 0             |   | 0.04                   | 829.260  | 0.000         | 1                  | lqpt               |
|                                    | 1.049                | 0             |   | 0.04                   | 830.493  | 1.232         | 1                  | lqpt               |
|                                    | 1.000                | 0             |   | 0                      | 830.664  | 1.401         | 3                  | lqpth              |
| <i>L. agraria</i><br>1170 models   | 1.000                | 0             |   | 0                      | 830.667  | 1.407         | 3                  | lqpth              |
|                                    | 1.000                | 0             |   | 0                      | 830.667  | 1.407         | 3                  | lqpth              |
|                                    | 1.000                | 0             |   | 0.04                   | 831.205  | 1.945         | 1                  | lqpt               |
|                                    | 1.000                | 00            |   | 0.04                   | 831.208  | 1.948         | 1                  | lqpt               |
|                                    | 1.036                | 0             |   | 0.01                   | 2425.36  | 0             | 3                  | l                  |
| <i>L. ingenua</i><br>15,561 models | 1.035                | 0             |   | 0.03                   | 2425.366 | 0.005         | 0.1                | l                  |
|                                    | 1.036                | 0             |   | 0.03                   | 2425.366 | 0.005         | 0.3                | l                  |
|                                    | 1.036                | 0             |   | 0.03                   | 2425.366 | 0.005         | 0.5                | l                  |
|                                    | 1.035                | 0             |   | 0.03                   | 2425.366 | 0.005         | 0.7                | l                  |
|                                    | 1.035                | 0             |   | 0.03                   | 2425.366 | 0.005         | 1                  | l                  |

|                   |       |   |       |          |       |     |     |
|-------------------|-------|---|-------|----------|-------|-----|-----|
|                   | 1.052 | 0 | 0.031 | 2766.137 | 0     | 3   |     |
|                   | 1.047 | 0 | 0.046 | 2766.874 | 0.736 | 0.1 |     |
| <i>L. sativae</i> | 1.044 | 0 | 0.046 | 2766.874 | 0.736 | 0.3 |     |
| 5400 models       | 1.046 | 0 | 0.046 | 2766.874 | 0.736 | 0.5 |     |
|                   | 1.045 | 0 | 0.031 | 2766.874 | 0.736 | 0.7 |     |
|                   | 1.043 | 0 | 0.015 | 2766.874 | 0.736 | 1   |     |
|                   | 1.000 | 0 | 0     | 2767.922 | 1.784 | 3   | pth |

---

450

451

452 Table 2 – Models and variables that were relatively uncorrelated (Pearson's correlation  
453  $\leq 0.8$ ) for *Lycoriella* species. The models were built and tested used 26 variables sets  
454 for *L. agraria*, 247 variables sets for *L. ingenua*, and 120 variables sets for *L. sativae*.  
455

| Species           | Uncorrelated variables               | Variable contribution (%) |
|-------------------|--------------------------------------|---------------------------|
| <i>L. agraria</i> | Mean diurnal range                   | 4.60                      |
|                   | Mean temperature of warmest quarter  | 48.67                     |
|                   | Mean temperature of coldest quarter  | 0.00                      |
|                   | Precipitation of wettest quarter     | 22.67                     |
|                   | Precipitation of driest quarter      | 24.05                     |
| <i>L. ingenua</i> | Temperature seasonality              | 28.90                     |
|                   | Maximum temperature of warmest month | 0.00                      |
|                   | Mean temperature of coldest quarter  | 49.80                     |
|                   | Precipitation of wettest quarter     | 21.30                     |
| <i>L. sativae</i> | Mean diurnal range                   | 38.26                     |
|                   | Maximum temperature of warmest month | 29.44                     |
|                   | Temperature annual range             | 0.00                      |
|                   | Mean temperature of coldest quarter  | 7.89                      |
|                   | Annual precipitation                 | 8.18                      |
|                   | Precipitation of wettest quarter     | 5.77                      |
|                   | Precipitation of driest quarter      | 10.41                     |

456

457

1 Figure 1. Potential distributions of three *Lycoriella* species under present and future  
2 climate conditions under two emissions scenarios (RCP 4.5 and RCP 8.5). Models  
3 show potential for range expansion worldwide in areas with low extrapolation risk.

bioRxiv preprint doi: <https://doi.org/10.1101/2021.07.23.453546>; this version posted July 23, 2021. The copyright holder for this preprint (which was not certified by peer review) is the author/funder, who has granted bioRxiv a license to display the preprint in perpetuity. It is made available under aCC-BY 4.0 International license.

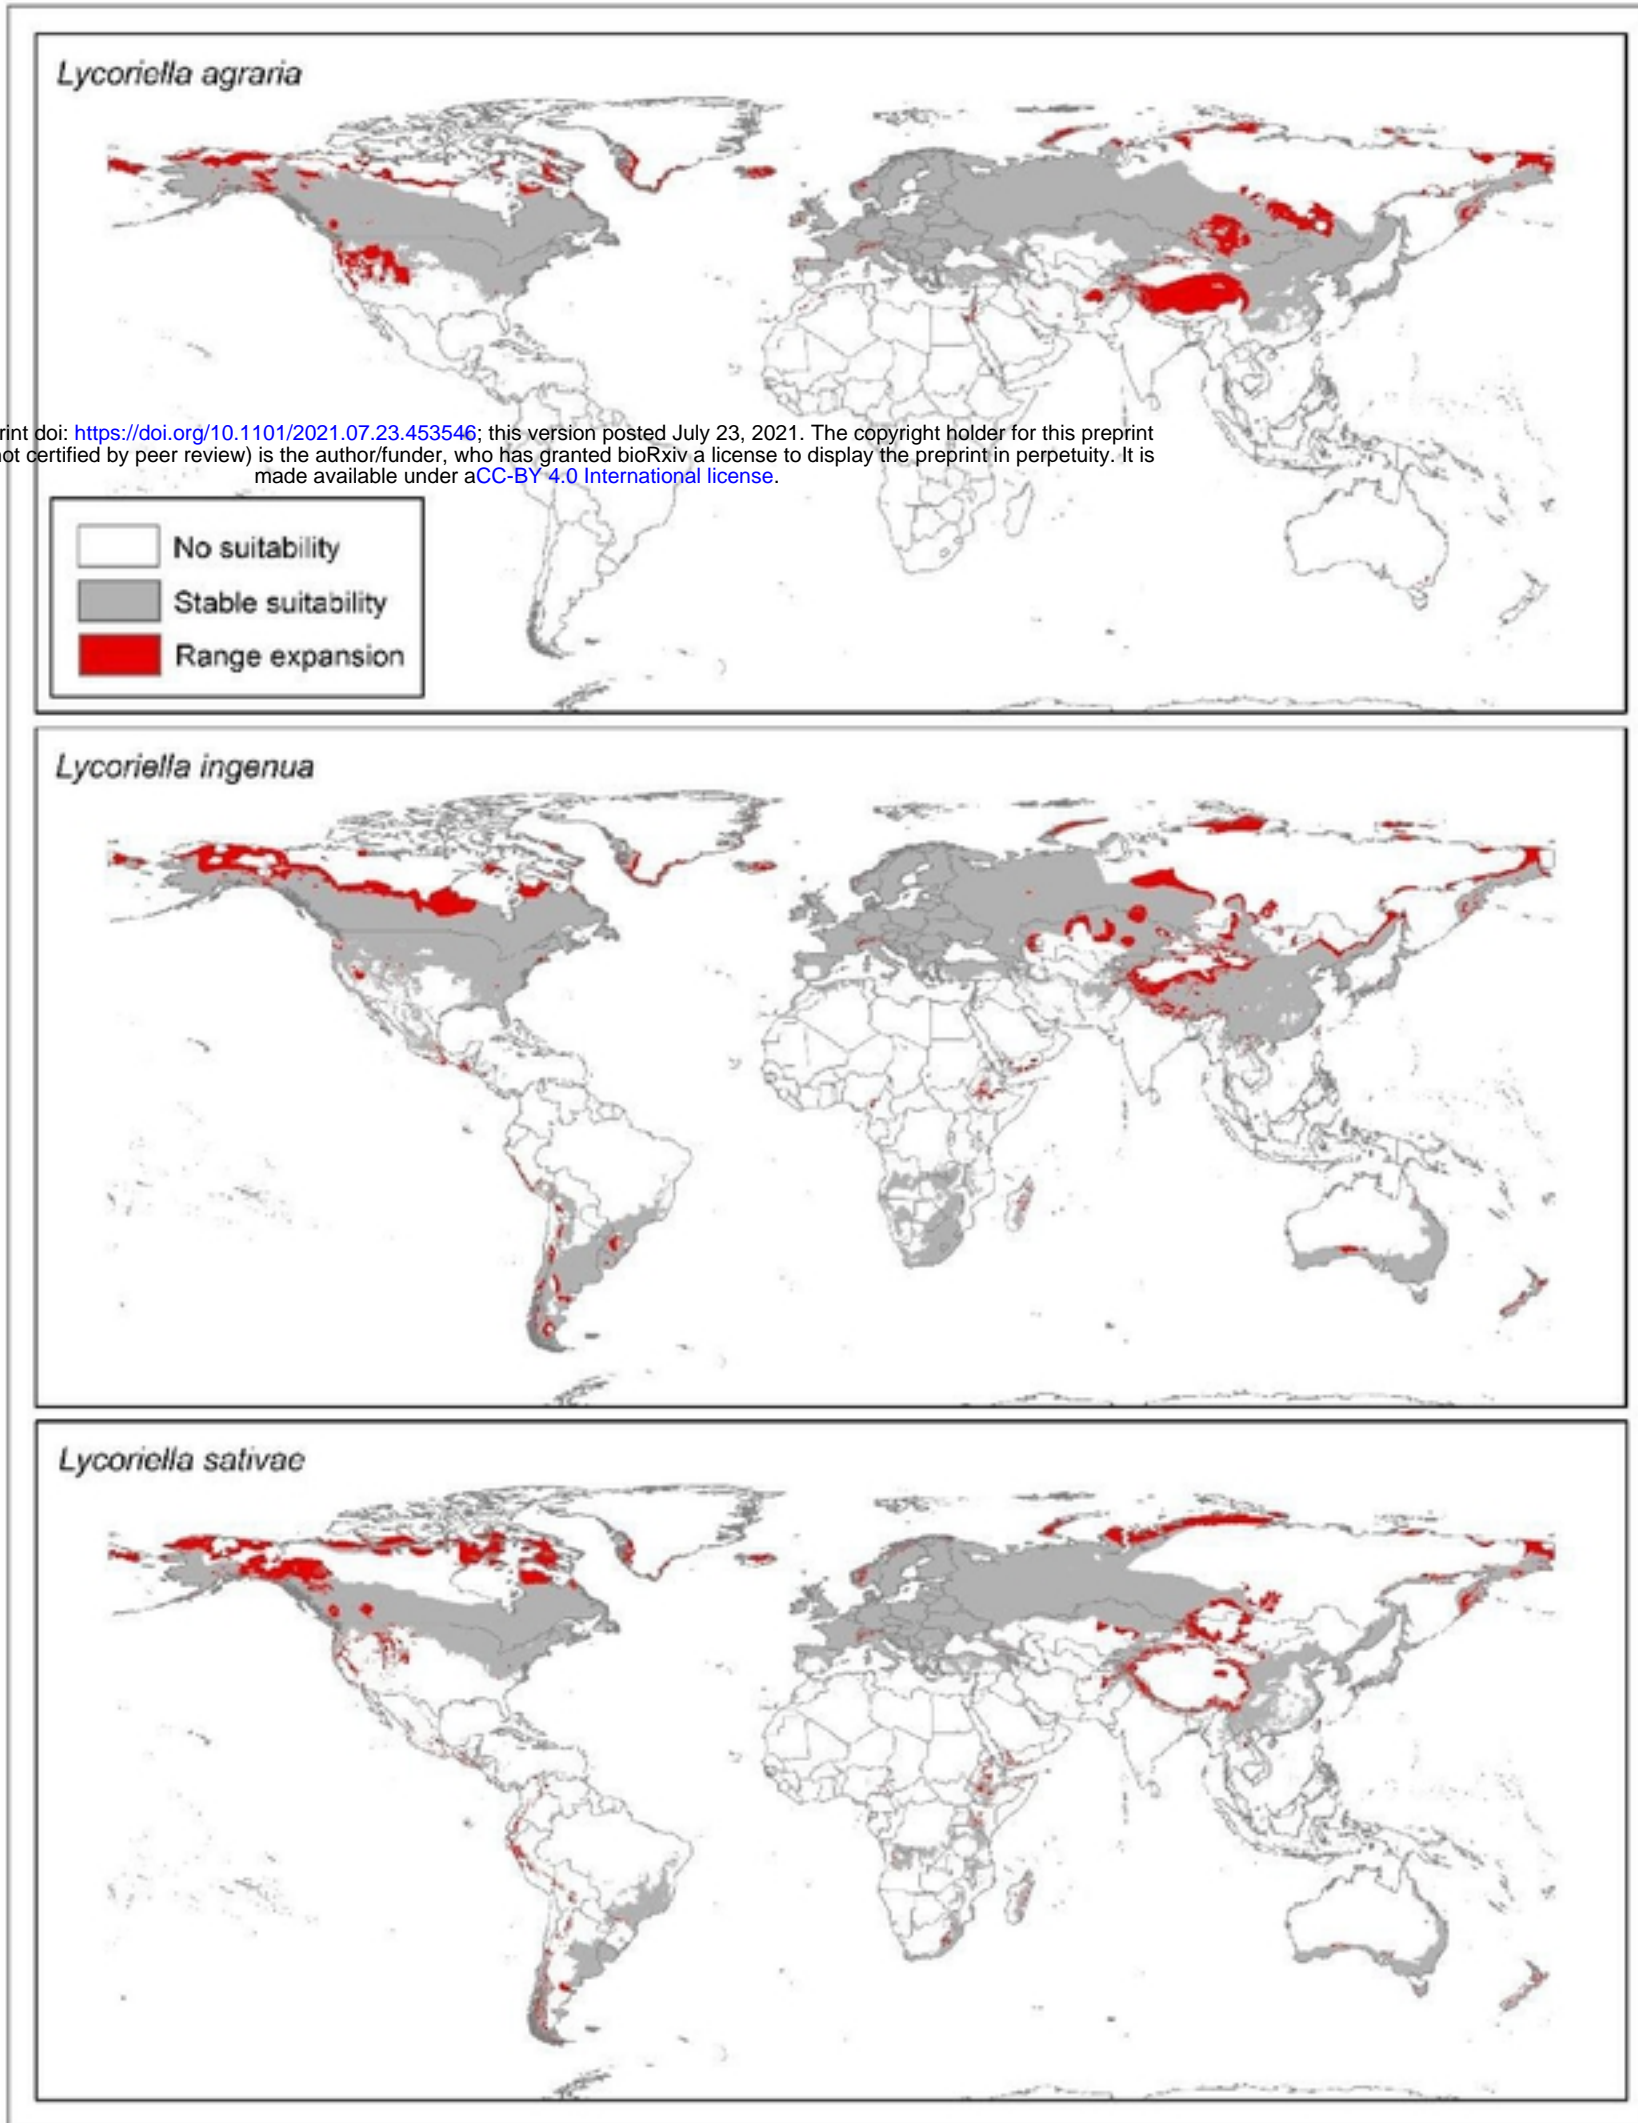

4

5

6



7 Figure 2. Environmental suitability for three *Lycoriella* species under current climate  
8 conditions worldwide.

9

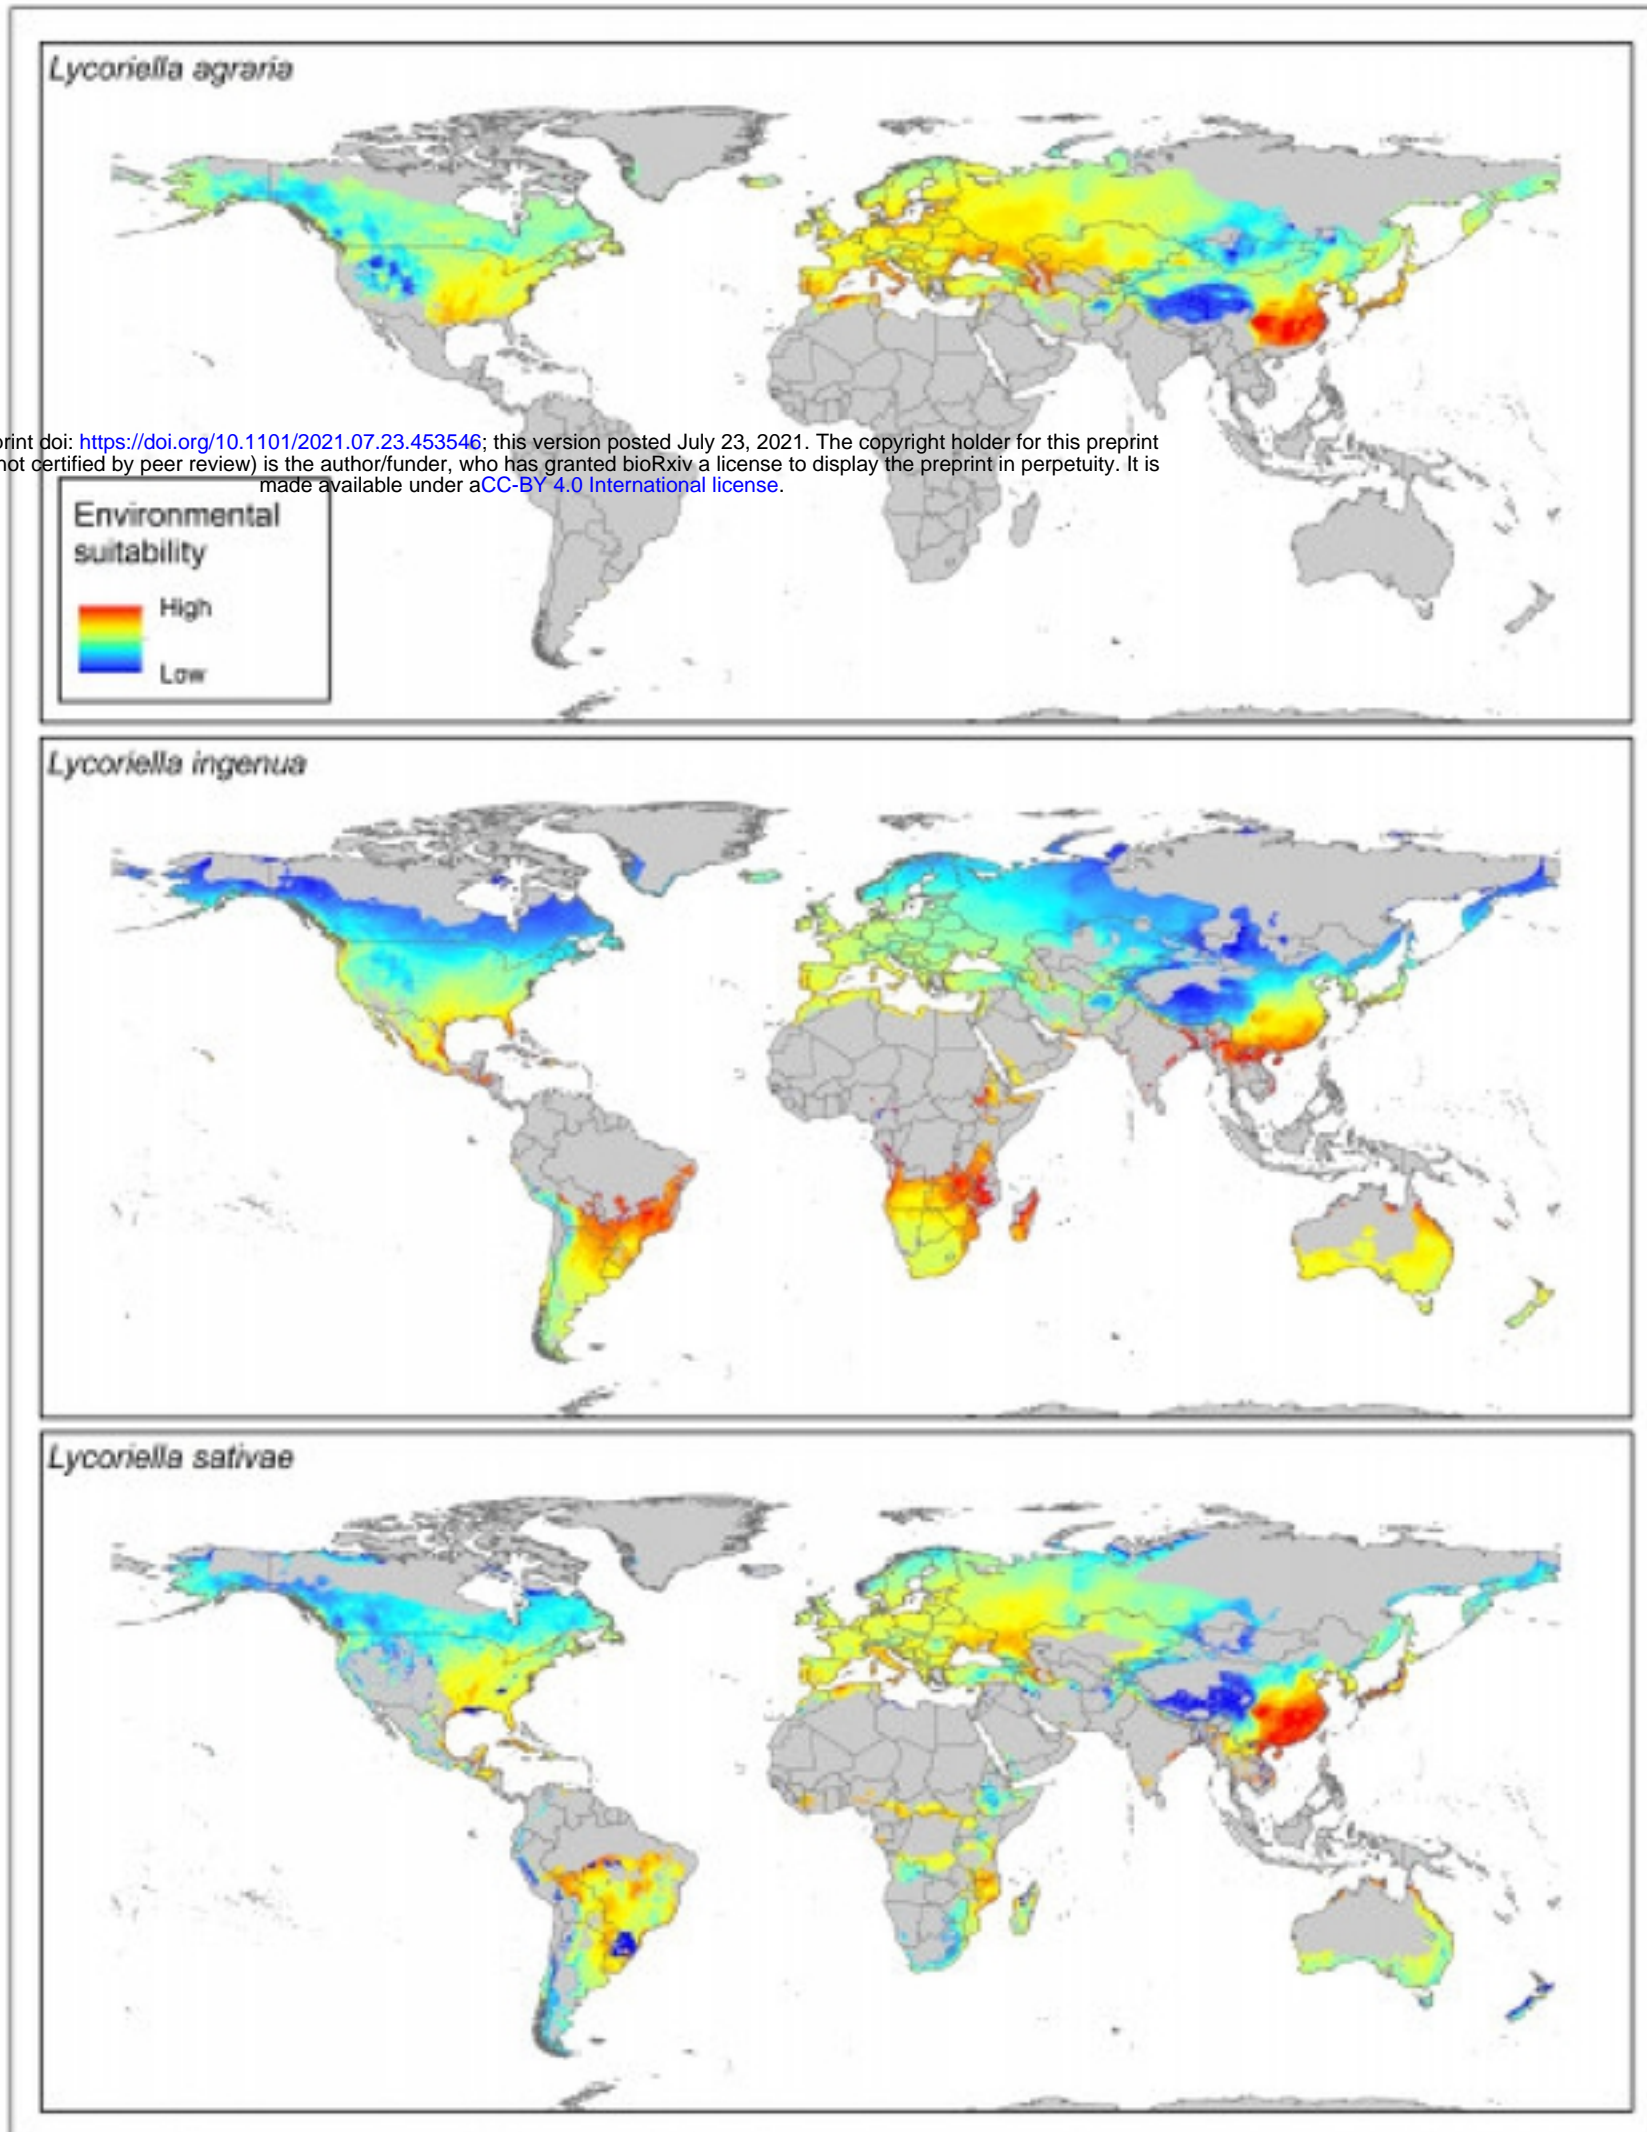

bioRxiv preprint doi: <https://doi.org/10.1101/2021.07.23.453546>; this version posted July 23, 2021. The copyright holder for this preprint (which was not certified by peer review) is the author/funder, who has granted bioRxiv a license to display the preprint in perpetuity. It is made available under aCC-BY 4.0 International license.

10
